# Supplementary material for: Inactivation of XPF Sensitizes Cancer Cells to Gemcitabine
Source: PubMed Central journal article supplement (PMC6421022; doi:10.1155/2019/6357609), 2019-03-03
Supplement: 6357609.f1.pdf [file 6357609.f1.pdf]

## **Supplemental information**

### Supplemental Figure 1.

The expression of the wild type human XPF and the endonuclease deficient human XPF(DA) in CHO UV41 cells.

### Supplemental Figure 2.

Confirmation of DNA repair defective phenotypes in the XPF-suppressed cells.

### Supplemental Figure 3.

Basic characterizations of the XPF-defective HCT116 cells.

### Supplemental Figure 4.

Biochemical fractionations of cell lysates.

### Supplemental Figure 5.

Impact of gemcitabine on the recruitment of APE to chromatin.

### Supplemental Figure 6.

Characterizations of BRCA2-deficient cells and their HR-restored revertants.

### Supplemental Figure 7.

Proposed mechanism of the removal of gemcitabine-induced DNA lesions.

### Supplemental Table 1.

List of surviving fraction with standard deviation of each experiment.

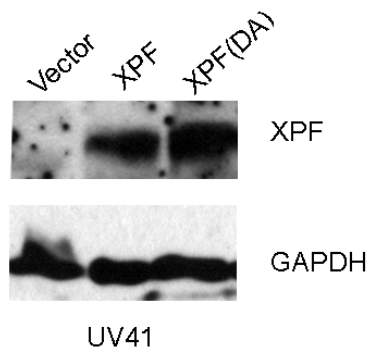

**Supplemental Figure 1. The expression of human XPF in the XPF-defective UV41 cells.** The human XPF gene was expressed in Chinese Hamster Ovary cell line, UV41. Cell lysates (100  $\mu$ g) from UV41 cells with a control vector (Vector), wild type human XPF (XPF) or the endonuclease defective XPF(DA), were analyzed by the western blotting. Wild type human XPF and the endonuclease defective XPF(DA) were expressed at a similar level. GAPDH was used as loading control.

A.

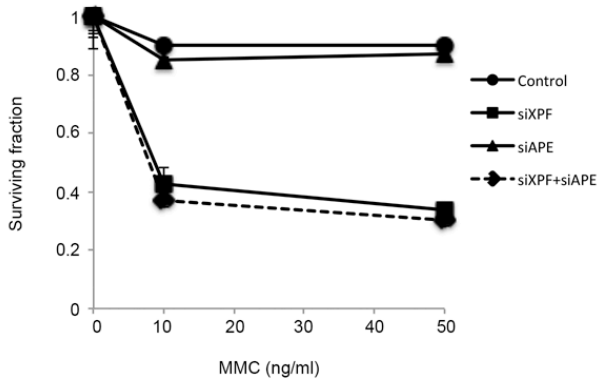

B.

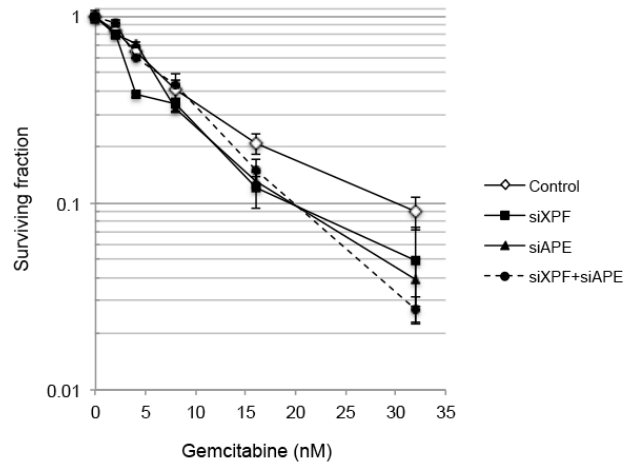

### Supplemental Figure 2. Confirmation of a DNA repair defective phenotype in the XPF-suppressed cells.

(A) MMC-sensitivity of the XPF-suppressed HeLa cells was examined. HeLa cells treated with siXPF alone, siAPE alone, or the combination of siXPF and siAPE were treated with the indicated concentration of mitomycin C (MMC). Cells with siXPF alone and the combination of siXPF and siAPE showed sensitivity to MMC ( $p < 0.01$ ), while siAPE-treatment alone did not result in the MMC-sensitivity. Three independent experiments were performed and averages of surviving fraction are plotted. The error bars show standard deviations.

(B) Sensitization of HeLa cells to gemcitabine by the suppression of XPF or APE. HeLa cells treated with siXPF alone, siAPE alone or the combination of siXPF and siAPE were treated with the indicated concentration of gemcitabine. Cells with siXPF alone and the siAPE alone showed sensitivity to gemcitabine at 32 nM ( $p < 0.05$ ). Surviving fractions at 32 nM of gemcitabine were  $0.090 \pm 0.018$  for siControl,  $0.049 \pm 0.026$  for siXPF and  $0.039 \pm 0.011$  for siAPE. A simultaneous suppression of XPF and APE-treatment did not change the gemcitabine-sensitivity. Three independent experiments were performed and averages of surviving fraction are plotted. The error bars show standard deviations.

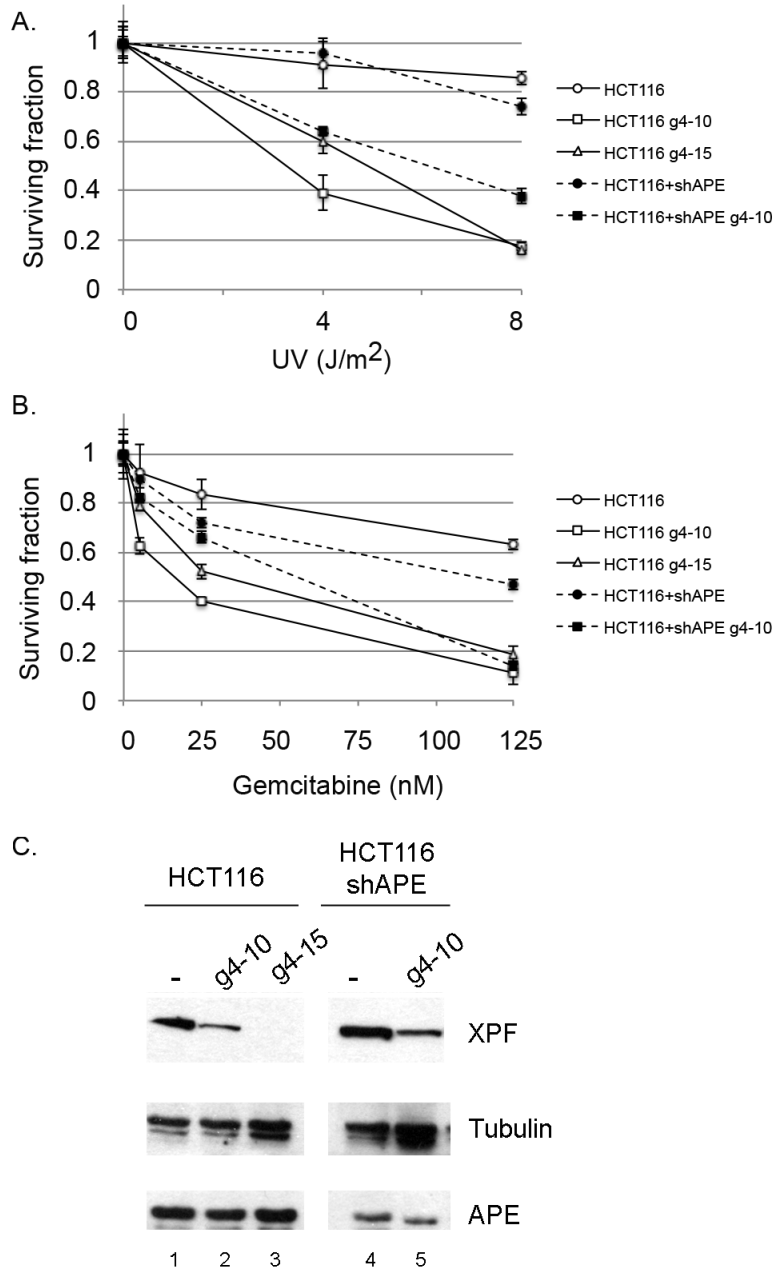

**Supplemental Figure 3. Characterizations of the XPF-defective HCT116 cells.**

XPF-deficient HCT116 cells were generated by CRISPR/Cas9 technology. (A, B) The XPF-deficient cells showed the UV-sensitive phenotype due to a defect in nucleotide excision repair and also displayed the sensitivity to gemcitabine. The XPF mutant with the APE suppression (HCT116 shAPE g4-10) showed similar sensitivity to gemcitabine to the XPF-mutants (HCT116 g4-10 and g4-15), confirming the epistatic relationship between the XPF- deficiency and the APE-deficiency in the gemcitabine-induced cytotoxicity. Three independent experiments were performed and averages of surviving fraction are plotted. The error bars show standard deviations. Surviving fractions, standard deviations and p-values are listed in Supplemental Table 1. (C) Western blots showed significant reductions of the expression of XPF in HCT116 g4-10 (~80% reduction in lane 2) and g4-15 (>95% reduction in lane 3), and HCT116 shAPE g4-10 (~90% reduction in lane 5). APE was suppressed by ~50% in HCT116 shAPE cell lines (compare lanes 1 and 4). Tubulin was used as loading control for the western blots. Five  $\mu$ g of cell lysate from each cell line was analyzed.

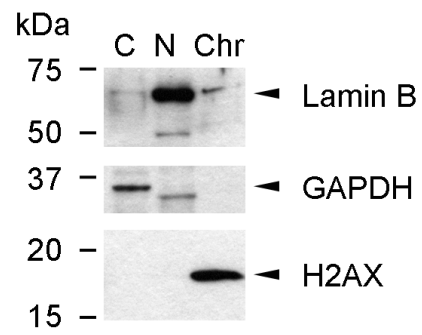

**Supplemental Figure 4. Biochemical fractionations of cell lysates.** Western blots demonstrate typical results of the fractionations of cytosolic (C), nuclear (N), and chromatin (Chr) fractions. GAPDH, lamin B and Histone H2AX were used as markers for cytosol, nuclear and chromatin.

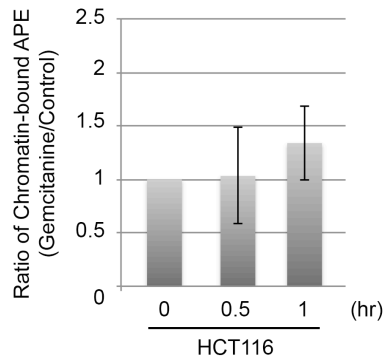

**Supplemental Figure 5. The gemcitabine-treatment does not change the amount of APE on chromatin.** Levels of the chromatin-bound APE were not changed after the treatment with 1  $\mu$ M gemcitabine. The averages from three independent experiments were depicted as a bar graph. The error bars represent standard deviations from three independent experiments.

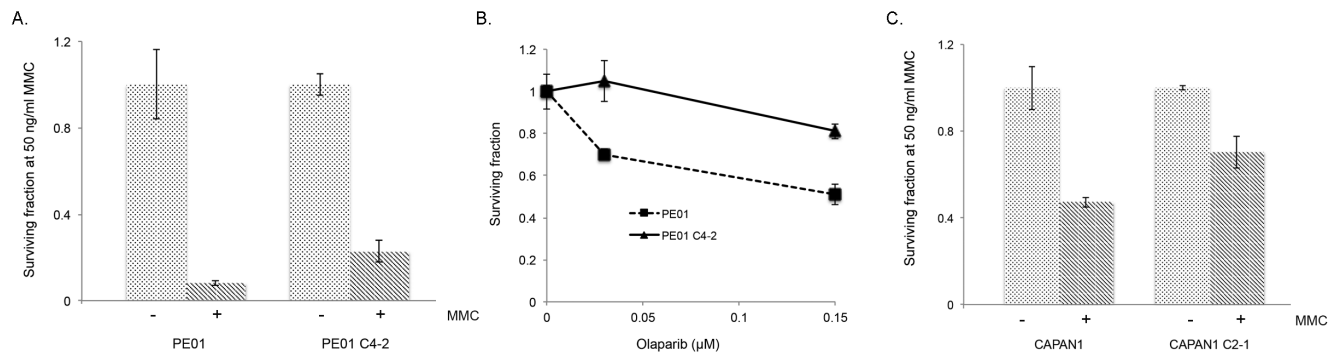

**Supplemental Figure 6. Characterizations of BRCA2-deficient cells and their revertants.** (A, C) BRCA2-deficient PE01 and CAPAN1 showed the MMC-sensitivity and their BRCA2-revertants, PE01(C4-2) and CAPAN1(C2-1) restored the MMC-resistance (with  $p < 0.01$ ). Cells were treated with 50 ng/ml MMC for two hours. After removing MMC, the cells were grown in fresh medium for 5-7 days. (B) PE01 also displayed sensitivity to PARP-inhibitor, olaparib, while PE01(C2-1) was resistant to olaparib. These data confirm that PE01 and CAPAN1 are defective in BRCA2-mediated homologous recombination and their BRCA2-revertants regain the HR activity. Three independent experiments were performed and averages of surviving fraction are plotted. The error bars show standard deviations.

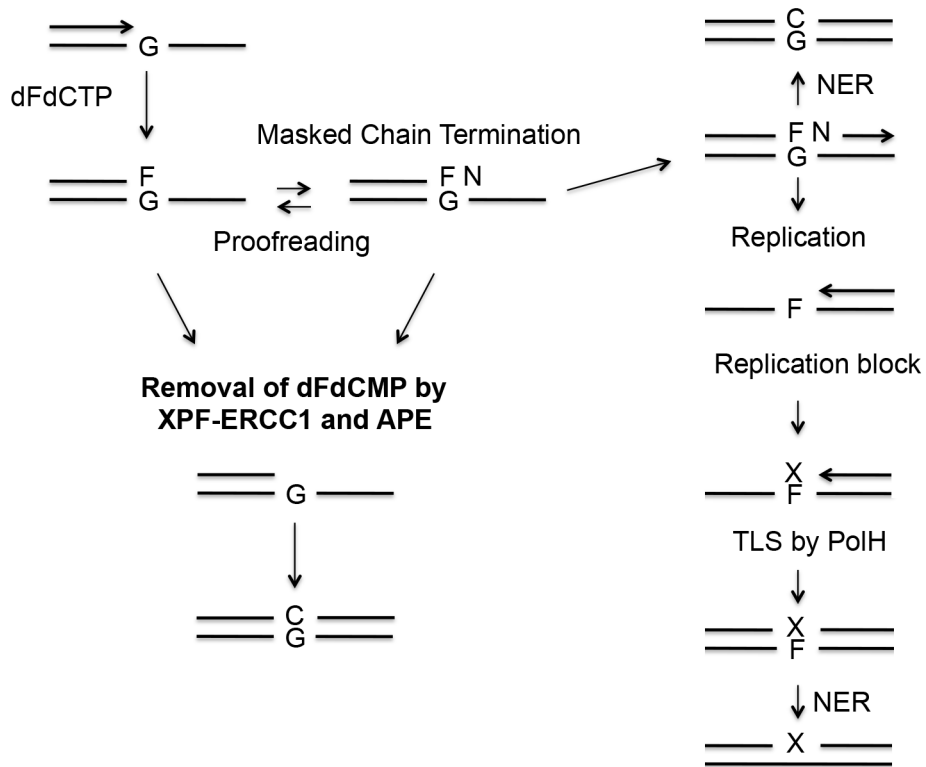

**Supplemental Figure 7. Proposed mechanism of the removal of gemcitabine-induced DNA lesions.** Please see the Discussion for the detail.



**Supplemental Table 1**  
**Surviving fraction and standard deviation at each concentration of gemcitabine**

**Figure 1: UV41**

| Cell line/treatment | Gemcitabine (nM) | Surviving Fraction | Standard Deviation |
|---------------------|------------------|--------------------|--------------------|
| Vector              | 0                | 1                  | 0.010              |
|                     | 0.1              | 0.976              | 0.056              |
|                     | 0.4              | 0.843              | 0.048              |
|                     | 1.6              | 0.639              | 0.032              |
|                     | 6.4              | 0.163              | 0.036              |
|                     |                  |                    |                    |
| XPF                 | 0                | 1                  | 0.016              |
|                     | 0.1              | 1.01               | 0.063              |
|                     | 0.4              | 0.967              | 0.040              |
|                     | 1.6              | 0.869              | 0.021              |
|                     | 6.4              | 0.520              | 0.021              |
|                     |                  |                    |                    |
| XPF(DA)             | 0                | 1                  | 0.023              |
|                     | 0.1              | 0.943              | 0.005              |
|                     | 0.4              | 0.761              | 0.031              |
|                     | 1.6              | 0.681              | 0.023              |
|                     | 6.4              | 0.179              | 0.041              |
|                     |                  |                    |                    |

**Figure 2 : HeLa siXPF/siAPE**

| Cell line/treatment | Gemcitabine (nM) | Surviving Fraction | Standard Deviation | *P-value |
|---------------------|------------------|--------------------|--------------------|----------|
| siControl           | 0                | 1                  | 0.112              |          |
|                     | 2                | 0.965              | 0.070              |          |
|                     | 10               | 0.453              | 0.069              |          |
|                     | 50               | 0.081              | 0.010              |          |
| siXPF               | 0                | 1                  | 0.073              |          |
|                     | 2                | 0.746              | 0.089              | 0.032    |
|                     | 10               | 0.174              | 0.055              | 0.0025   |
|                     | 50               | 0.018              | 0.020              | 0.00027  |
| siAPE               | 0                | 1                  | 0.050              |          |
|                     | 2                | 0.762              | 0.105              | 0.060    |
|                     | 10               | 0.205              | 0.055              | 0.0015   |
|                     | 50               | 0.032              | 0.011              | 0.011    |
| siXPF+siAPE         | 0                | 1                  | 0.060              |          |
|                     | 2                | 0.718              | 0.088              | 0.057    |
|                     | 10               | 0.187              | 0.049              | 0.0078   |
|                     | 50               | 0.037              | 0.020              | 0.0011   |

\*Comparison of siXPF, siAPE or siXPF+siAPE with Control at each concentration of gemcitabine.

**Supplemental Figure 2B: HeLa siXPF/siAPE**

| Cell line/treatment | Gemcitabine (nM) | Surviving Fraction | Standard Deviation | *P-value |
|---------------------|------------------|--------------------|--------------------|----------|
| siControl           | 0                | 1                  | 0.020              |          |
|                     | 2                | 0.849              | 0.082              |          |
|                     | 4                | 0.656              | 0.055              |          |
|                     | 8                | 0.415              | 0.047              |          |
|                     | 16               | 0.210              | 0.027              |          |
|                     | 32               | 0.090              | 0.018              |          |
| siXPF               | 0                | 1                  | 0.020              |          |
|                     | 2                | 0.819              | 0.030              | 0.501    |
|                     | 4                | 0.389              | 0.010              | 0.008    |
|                     | 8                | 0.343              | 0.010              | 0.076    |
|                     | 16               | 0.127              | 0.026              | 0.030    |
|                     | 32               | 0.049              | 0.026              | 0.043    |
| siAPE               | 0                | 1                  | 0.020              |          |
|                     | 2                | 0.819              | 0.030              | 0.501    |
|                     | 4                | 0.715              | 0.017              | 0.121    |
|                     | 8                | 0.322              | 0.012              | 0.027    |
|                     | 16               | 0.133              | 0.010              | 0.015    |
|                     | 32               | 0.039              | 0.011              | 0.006    |
| siXPF+siAPE         | 0                | 1                  | 0.076              |          |
|                     | 2                | 0.926              | 0.038              | 0.297    |
|                     | 4                | 0.603              | 0                  | 0.437    |
|                     | 8                | 0.439              | 0.065              | 0.027    |
|                     | 16               | 0.158              | 0.021              | 0.011    |
|                     | 32               | 0.027              | 0.004              | 0.016    |

\*Comparison of siXPF, siAPE or siXPF+siAPE with Control at each concentration of gemcitabine.

**HCT116 cell lines**

**Supplemental Figure 3A: UV**

| Cell line/treatment | UV (J/m <sup>2</sup> ) | Surviving Fraction | Standard Deviation | *P-value |
|---------------------|------------------------|--------------------|--------------------|----------|
| HCT116              | 0                      | 1                  | 0.081              |          |
|                     | 4                      | 0.910              | 0.096              |          |
|                     | 8                      | 0.857              | 0.026              |          |
| HCT116 g4-10        | 0                      | 1                  | 0.064              |          |
|                     | 4                      | 0.391              | 0.071              | 0.0057   |
|                     | 8                      | 0.175              | 0.017              | 0.0019   |
| HCT116 g4-15        | 0                      | 1                  | 0.024              |          |
|                     | 4                      | 0.601              | 0.050              | 0.0025   |
|                     | 8                      | 0.162              | 0.014              | 0.0021   |
| HCT116 shAPE        | 0                      | 1                  | 0.054              |          |
|                     | 4                      | 0.956              | 0.062              | 0.393    |
|                     | 8                      | 0.741              | 0.032              | 0.032    |
| HCT116 shAPE g4-10  | 0                      | 1                  | 0.065              |          |
|                     | 4                      | 0.642              | 0.018              | 0.015    |
|                     | 8                      | 0.378              | 0.031              | 0.0055   |

**Supplemental Figure 3B:gemcitabine**

| Cell line/treatment | Gemcitabine (nM) | Surviving Fraction | Standard Deviation | *P-value |
|---------------------|------------------|--------------------|--------------------|----------|
| HCT116              | 0                | 1                  | 0.101              |          |
|                     | 5                | 0.924              | 0.112              |          |
|                     | 25               | 0.834              | 0.059              |          |
|                     | 125              | 0.631              | 0.022              |          |
| HCT116 g4-10        | 0                | 1                  | 0.076              |          |
|                     | 5                | 0.627              | 0.033              | 0.0046   |
|                     | 25               | 0.401              | 0.012              | 0.0020   |
|                     | 125              | 0.109              | 0.043              | 0.0071   |
| HCT116 g4-15        | 0                | 1                  | 0.049              |          |
|                     | 5                | 0.739              | 0.018              | 0.031    |
|                     | 25               | 0.497              | 0.028              | 0.0081   |
|                     | 125              | 0.333              | 0.037              | 0.0075   |
| HCT116 shAPE        | 0                | 1                  | 0.043              |          |
|                     | 5                | 0.895              | 0.034              | 0.196    |
|                     | 25               | 0.720              | 0.019              | 0.018    |
|                     | 125              | 0.469              | 0.054              | 0.020    |
| HCT116 shAPE g4-10  | 0                | 1                  | 0.041              |          |
|                     | 5                | 0.820              | 0.018              | 0.060    |
|                     | 25               | 0.661              | 0.024              | 0.014    |
|                     | 125              | 0.137              | 0.024              | 0.0048   |

\*Comparison of each mutant cell line to HCT116 at each UV dose and concentration of gemcitabine.
